# Supplementary material
Source: MDPI journal article supplement (https://www.mdpi.com/2077-0472/13/4/784)
Supplement: s1 [file s1]

**Table S1: ANOVA of Grain yield, Total biomass yield, NR, and BC ratio (Factorial RCBD)**

**ANOVA Table of Total Biomass Yield**

| Source of variation | Degrees of freedom | Sum of squares | Mean sum of squares | F cal | F prob | S/NS |
|---------------------|--------------------|----------------|---------------------|-------|--------|------|
| Replications        | 2                  | 1.285          | 0.643               | 0.358 | 0.701  | NS   |
| Treatments          | 23                 | 163.663        | 7.116               | 3.963 | 0.000  | S    |
| Year                | 1                  | 0.390          | 0.390               | 0.217 | 0.643  | NS   |
| Treatment           | 11                 | 143.902        | 13.082              | 7.286 | 0.000  | S    |
| Year X Treatment    | 11                 | 19.372         | 1.761               | 0.981 | 0.477  | NS   |
| Error               | 46                 | 82.595         | 1.796               | -     | -      |      |
| Total               | 71                 | -              | -                   | -     | -      |      |

**ANOVA Table of Grain Yield**

| Source of variation | Degrees of freedom | Sum of squares | Mean sum of squares | F cal | F prob | S/NS |
|---------------------|--------------------|----------------|---------------------|-------|--------|------|
| Replications        | 2                  | 0.309          | 0.154               | 0.643 | 0.53   | NS   |
| Treatments          | 23                 | 14.004         | 0.609               | 2.537 | 0.004  | S    |
| Year                | 1                  | 0.724          | 0.724               | 3.016 | 0.089  | S    |
| Treatment           | 11                 | 12.527         | 1.139               | 4.745 | 0.000  | S    |
| Year X Treatment    | 11                 | 0.753          | 0.068               | 0.285 | 0.986  | NS   |
| Error               | 46                 | 11.041         | 0.24                |       |        |      |
| Total               | 71                 |                |                     |       |        |      |

**ANOVA Table of Net Return**

| Source of variation | Degrees of freedom | Sum of squares | Mean sum of squares | F cal | F prob | S/NS |
|---------------------|--------------------|----------------|---------------------|-------|--------|------|
| Replications        | 2                  | 41138.757      | 20569.378           | 0.633 | 0.535  | NS   |
| Treatments          | 23                 | 2540708.253    | 110465.576          | 3.402 | 0.000  | S    |
| Year                | 1                  | 5474.067       | 5474.067            | 0.169 | 0.683  | NS   |
| Treatment           | 11                 | 2430493.468    | 220953.952          | 6.804 | 0.000  | S    |
| Year X Treatment    | 11                 | 104740.718     | 9521.883            | 0.293 | 0.984  | NS   |
| Error               | 46                 | 1493762.976    | 32473.108           | -     | -      |      |
| Total               | 71                 | -              | -                   | -     | -      |      |

**ANOVA Table of Benefit-cost ratio**

| Source of variation | Degrees of freedom | Sum of squares | Mean sum of squares | F cal | F prob | S/NS |
|---------------------|--------------------|----------------|---------------------|-------|--------|------|
| Replications        | 2                  | 0.158          | 0.079               | 0.642 | 0.531  | NS   |
| Treatments          | 23                 | 7.898          | 0.343               | 2.797 | 0.001  | S    |
| Year                | 1                  | 0.142          | 0.142               | 1.158 | 0.287  | S    |
| Treatment           | 11                 | 7.376          | 0.671               | 5.462 | 0.000  | S    |
| Year X Treatment    | 11                 | 0.379          | 0.034               | 0.281 | 0.987  | NS   |
| Error               | 46                 | 5.648          | 0.123               | -     | -      |      |
| Total               | 71                 | -              | -                   | -     | -      |      |

Table S2: ANOVA Table of PFP and AE of N, P, and K

## ANOVA Table of PFP N

| Source of variation | Degrees of freedom | Sum of squares | Mean sum of squares | F cal  | F prob | S/NS |
|---------------------|--------------------|----------------|---------------------|--------|--------|------|
| Replications        | 2                  | 0.185          | 0.093               | 0.007  | 0.993  | NS   |
| Treatments          | 23                 | 11596.833      | 504.210             | 38.184 | 0.000  | S    |
| Year                | 1                  | 46.964         | 46.964              | 3.557  | 0.066  | S    |
| Treatment           | 11                 | 11512.950      | 1046.632            | 79.262 | 0.000  | S    |
| Year X Treatment    | 11                 | 36.919         | 3.356               | 0.254  | 0.991  | NS   |
| Error               | 46                 | 607.416        | 13.205              | -      | -      |      |
| Total               | 71                 | -              | -                   | -      | -      |      |

## ANOVA Table of PFP P

| Source of variation | Degrees of freedom | Sum of squares | Mean sum of squares | F cal   | F prob | S/NS |
|---------------------|--------------------|----------------|---------------------|---------|--------|------|
| Replications        | 2                  | 6.711          | 3.355               | 0.038   | 0.963  | NS   |
| Treatments          | 23                 | 98529.562      | 4283.894            | 48.620  | 0.000  | S    |
| Year                | 1                  | 134.863        | 134.863             | 1.531   | 0.222  | S    |
| Treatment           | 11                 | 98105.120      | 8918.647            | 101.221 | 0.000  | S    |
| Year X Treatment    | 11                 | 289.579        | 26.325              | 0.299   | 0.983  | NS   |
| Error               | 46                 | 4053.085       | 88.111              | -       | -      |      |
| Total               | 71                 |                |                     |         |        |      |

## ANOVA Table of PFP K

| Source of variation | Degrees of freedom | Sum of squares | Mean sum of squares | F cal   | F prob | S/NS |
|---------------------|--------------------|----------------|---------------------|---------|--------|------|
| Replications        | 2                  | 225.362        | 112.681             | 2.239   | 0.9578 | NS   |
| Treatments          | 23                 | 80049.514      | 3480.414            | 69.149  | 0.000  | S    |
| Year                | 1                  | 74.685         | 74.685              | 1.484   | 0.229  | S    |
| Treatment           | 11                 | 79731.683      | 7248.335            | 144.010 | 0.000  | S    |
| Year X Treatment    | 11                 | 243.146        | 22.104              | 0.439   | 0.930  | NS   |
| Error               | 46                 | 2315.283       | 50.332              | -       | -      |      |
| Total               | 71                 | -              | -                   | -       | -      |      |

## ANOVA Table of AE N

| Source of variation | Degrees of freedom | Sum of squares | Mean sum of squares | F cal | F prob | S/NS |
|---------------------|--------------------|----------------|---------------------|-------|--------|------|
| Replications        | 2                  | 43.807         | 21.903              | 2.732 | 0.8547 | NS   |
| Treatments          | 23                 | 706.851        | 30.733              | 3.833 | 0.000  | S    |
| Year                | 1                  | 22.984         | 22.984              | 2.867 | 0.097  | S    |
| Treatment           | 11                 | 657.972        | 59.816              | 7.460 | 0.000  | S    |
| Year X Treatment    | 11                 | 25.895         | 2.354               | 0.294 | 0.984  | NS   |
| Error               | 46                 | 368.815        | 8.018               | -     | -      |      |
| Total               | 71                 | -              | -                   | -     | -      |      |

## ANOVA Table of AE P

| Source of variation | Degrees of freedom | Sum of squares | Mean sum of squares | F cal | F prob | S/NS |
|---------------------|--------------------|----------------|---------------------|-------|--------|------|
| Replications        | 2                  | 95.945         | 47.972              | 0.669 | 0.517  | NS   |
| Treatments          | 23                 | 3895.738       | 169.380             | 2.361 | 0.007  | S    |
| Year                | 1                  | 0.327          | 0.327               | 0.005 | 0.946  | S    |

|                            |                    |                |                     |       |        |      |
|----------------------------|--------------------|----------------|---------------------|-------|--------|------|
| Treatment                  | 11                 | 3768.514       | 342.592             | 4.775 | 0.000  | S    |
| Year X Treatment           | 11                 | 126.898        | 11.536              | 0.161 | 0.999  | NS   |
| Error                      | 46                 | 3300.496       | 71.750              | -     | -      |      |
| Total                      | 71                 | -              | -                   | -     | -      |      |
| <b>ANOVA Table of AE K</b> |                    |                |                     |       |        |      |
| Source of variation        | Degrees of freedom | Sum of squares | Mean sum of squares | F cal | F prob | S/NS |
| Replications               | 2                  | 125.175        | 62.588              | 0.988 | 0.580  | NS   |
| Treatments                 | 23                 | 3023.403       | 131.452             | 2.074 | 0.018  | S    |
| Year                       | 1                  | 139.751        | 139.751             | 2.205 | 0.144  | S    |
| Treatment                  | 11                 | 2657.776       | 241.616             | 3.812 | 0.001  | S    |
| Year X Treatment           | 11                 | 225.875        | 20.534              | 0.324 | 0.976  | NS   |
| Error                      | 46                 | 2915.309       | 63.376              | -     | -      |      |
| Total                      | 71                 | -              | -                   | -     | -      |      |

|                                              |                    |                |                     |        |        |      |
|----------------------------------------------|--------------------|----------------|---------------------|--------|--------|------|
| <b>Table S3: ANOVA of IWP, TWP, and CWUE</b> |                    |                |                     |        |        |      |
| <b>ANOVA table of IWP</b>                    |                    |                |                     |        |        |      |
| Source of variation                          | Degrees of freedom | Sum of squares | Mean sum of squares | F cal  | F prob | S/NS |
| Replications                                 | 2                  | 0.013          | 0.007               | 0.629  | 0.538  | NS   |
| Treatments                                   | 23                 | 0.899          | 0.039               | 3.721  | 0.000  | S    |
| Year                                         | 1                  | 0.313          | 0.313               | 29.835 | 0.000  | S    |
| Treatment                                    | 11                 | 0.549          | 0.050               | 4.754  | 0.000  | S    |
| Year X Treatment                             | 11                 | 0.036          | 0.003               | 0.315  | 0.979  | NS   |
| Error                                        | 46                 | 0.483          | 0.011               | -      | -      |      |
| Total                                        | 71                 | -              | -                   | -      | -      |      |
| <b>ANOVA table of TWP</b>                    |                    |                |                     |        |        |      |
| Source of variation                          | Degrees of freedom | Sum of squares | Mean sum of squares | F cal  | F prob | S/NS |
| Replications                                 | 2                  | 0.004          | 0.002               | 0.649  | 0.527  | NS   |
| Treatments                                   | 23                 | 0.187          | 0.008               | 2.400  | 0.006  | S    |
| Year                                         | 1                  | 0.000          | 0.000               | 0.109  | 0.743  | S    |
| Treatment                                    | 11                 | 0.176          | 0.016               | 4.724  | 0.000  | S    |
| Year X Treatment                             | 11                 | 0.011          | 0.001               | 0.284  | 0.986  | NS   |
| Error                                        | 46                 | 0.156          | 0.003               | -      | -      |      |
| Total                                        | 71                 | -              | -                   | -      | -      |      |
| <b>ANOVA table of CWUE</b>                   |                    |                |                     |        |        |      |
| Source of variation                          | Degrees of freedom | Sum of squares | Mean sum of squares | F cal  | F prob | S/NS |
| Replications                                 | 2                  | 0.022          | 0.011               | 0.648  | 0.528  | NS   |
| Treatments                                   | 23                 | 0.919          | 0.040               | 2.399  | 0.006  | S    |
| Year                                         | 1                  | 0.000          | 0.000               | 0.024  | 0.878  | S    |
| Treatment                                    | 11                 | 0.867          | 0.079               | 4.730  | 0.000  | S    |
| Year X Treatment                             | 11                 | 0.052          | 0.005               | 0.283  | 0.986  | NS   |
| Error                                        | 46                 | 0.766          | 0.017               | -      | -      |      |
| Total                                        | 71                 | -              | -                   | -      | -      |      |
